# Supplementary material for: Long-Term Functional Hyperemia after Uncomplicated Phacoemulsification: Benefits beyond Restoring Vision
Source: MDPI journal article supplement (doi:10.3390/diagnostics12102449), 2022-10-10
Supplement: s1 [file s1]

**Article Title:** Long-term functional hyperemia after uncomplicated phacoemulsification: benefits beyond restoring vision

**Journal Name:** Diagnostics

**Author Names:** Ana Ćurić, Mirjana Bjeloš, Mladen Bušić, Biljana Kuzmanović Elabjer, Benedict Rak, Nenad Vukojević

**Corresponding author:**

Mirjana Bjeloš

University Eye Department, University Hospital "Sveti Duh"

Sveti Duh 64, Zagreb, Croatia

e-mail: dr.mbjelos@gmail.com

This article contains additional Supplementary Material: Supplementary Tables S1-S9.

**Table S1.** Statistical analysis of changes in vascular parameters in nerve fiber layer vascular plexus.

| NFLVP                                  | Before                           | 1 week after                      | 1 month after                      | 3 months after                     | 6 months after                     | <i>p</i>         | Change         |
|----------------------------------------|----------------------------------|-----------------------------------|------------------------------------|------------------------------------|------------------------------------|------------------|----------------|
| EA<br>(mm <sup>2</sup> )               | 8.3795<br>(8.3770-<br>8.3804)    | 8.3796<br>(8.3770-<br>8.3805)     | 8.3794<br>(8.3768-<br>8.3807)      | 8.3794<br>(8.3768-<br>8.3807)      | 8.3794 (8.3768-<br>8.3803)         | 0.889            | 0.01%          |
| VA<br>(mm <sup>2</sup> )               | 1.8591<br>(1.4153-<br>2.3589)    | 2.5353<br>(2.0353-<br>3.0919)     | 2.6530<br>(2.1733-<br>3.2279)      | 2.7846<br>(2.2839-<br>3.1992)      | 2.8117 (2.3376-<br>3.2735)         | <b>&lt;0.001</b> | <b>36.37%</b>  |
| VPA<br>(%)                             | 22.1838<br>(16.8914-<br>28.1471) | 30.2547<br>(24.2985-<br>36.8916)  | 31.6644<br>(25.9395-<br>38.5160)   | 33.2328<br>(27.2585-<br>38.1763)   | 33.5613<br>(27.8909-<br>39.1569)   | <b>&lt;0.001</b> | <b>36.38%</b>  |
| TNJ                                    | 495 (320-<br>731)                | 809 (593-<br>1049)                | 862 (644-<br>1109)                 | 906 (686-<br>1111)                 | 936 (728-1140)                     | <b>&lt;0.001</b> | <b>63.43%</b>  |
| JD<br>(junctions/<br>mm <sup>2</sup> ) | 59.2552<br>(38.1612-<br>87.2170) | 96.5340<br>(70.7350-<br>125.1407) | 102.8470<br>(76.8021-<br>132.3245) | 108.1508<br>(81.8590-<br>132.6084) | 111.6791<br>(87.0387-<br>136.0834) | <b>&lt;0.001</b> | <b>62.91%</b>  |
| TVL<br>(mm)                            | 71.1006<br>(53.6238-<br>92.1387) | 95.0071<br>(77.8507-<br>112.2952) | 101.7714<br>(83.9617-<br>118.3007) | 104.4058<br>(85.9790-<br>118.2746) | 103.9301<br>(87.8332-<br>118.7705) | <b>&lt;0.001</b> | <b>33.62%</b>  |
| AVL<br>(mm)                            | 0.1716<br>(0.1297-<br>0.2246)    | 0.2620<br>(0.1758-<br>0.3935)     | 0.2712<br>(0.2059-<br>0.4137)      | 0.3000<br>(0.2071-<br>0.4194)      | 0.2973 (0.2156-<br>0.4074)         | <b>&lt;0.001</b> | <b>52.68%</b>  |
| TNEP                                   | 999 (855-<br>1140)               | 1021 (882-<br>1135)               | 998 (864-<br>1106)                 | 994 (858-<br>1110)                 | 975 (891-1107)                     | 0.369            | 2.20%          |
| ML                                     | 0.3649<br>(0.2617-<br>0.5047)    | 0.2294<br>(0.1778-<br>0.3309)     | 0.2098<br>(0.1653-<br>0.2757)      | 0.2106<br>(0.1569-<br>0.2718)      | 0.2053 (0.1588-<br>0.2881)         | <b>&lt;0.001</b> | <b>-37.12%</b> |

NFLVP = nerve fiber layer vascular plexus; EA = explant area; VA = vessels area; VPA = vessels percentage area; TNJ = total number of junctions; JD = junctions density; TVL = total vessels length; AVL = average vessels length; TNEP = total number of end points; ML = mean lacunarity.

This table shows median and interquartile ranges for each parameter (25th and 75th percentile). *P* values and percentages of change are presented one week after phacoemulsification.

Friedman ANOVA test, significant difference (bold values) was found for values with *p* < 0.001.

**Table S2.** Statistical analysis of changes in vascular parameters in superficial vascular plexus.

| SVP                                    | Before                              | 1 week after                        | 1 month after                       | 3 months after                      | 6 months after                      | <i>p</i>         | Change         |
|----------------------------------------|-------------------------------------|-------------------------------------|-------------------------------------|-------------------------------------|-------------------------------------|------------------|----------------|
| EA<br>(mm <sup>2</sup> )               | 8.3801<br>(8.3790-<br>8.3806)       | 8.3801<br>(8.3790-<br>8.3806)       | 8.3801<br>(8.3793-<br>8.3807)       | 8.3801<br>(8.3790-<br>8.3809)       | 8.3801<br>(8.3790-<br>8.3807)       | 0.125            | 0.00%          |
| VA<br>(mm <sup>2</sup> )               | 4.5545<br>(4.0094-<br>4.9355)       | 5.0687<br>(4.8105-<br>5.3193)       | 5.0724<br>(4.8006-<br>5.3900)       | 5.1967<br>(4.9060-<br>5.4451)       | 5.1283<br>(4.9467-<br>5.4279)       | <b>&lt;0.001</b> | <b>11.29%</b>  |
| VPA<br>(%)                             | 54.5669<br>(47.8463-<br>58.8991)    | 60.4780<br>(57.4106-<br>63.5375)    | 60.5694<br>(57.7880-<br>64.3410)    | 62.0127<br>(58.5389-<br>64.9757)    | 61.2477<br>(59.0638-<br>64.7752)    | <b>&lt;0.001</b> | <b>10.83%</b>  |
| TNJ                                    | 1314 (1115-<br>1397)                | 1432 (1373-<br>1485)                | 1441 (1366-<br>1502)                | 1446 (1383-<br>1507)                | 1439 (1381-<br>1496)                | <b>&lt;0.001</b> | <b>8.98%</b>   |
| JD<br>(junctions/<br>mm <sup>2</sup> ) | 156.8099<br>(133.0305-<br>166.6892) | 170.9058<br>(163.7611-<br>177.2097) | 171.9498<br>(163.3842-<br>179.8371) | 172.7219<br>(165.0255-<br>179.8147) | 172.6123<br>(165.0242-<br>178.5276) | <b>&lt;0.001</b> | <b>8.99%</b>   |
| TVL<br>(mm)                            | 138.455<br>(127.844-<br>144.633)    | 146.063<br>(142.680-<br>149.708)    | 147.222<br>(142.383-<br>151.002)    | 147.244<br>(144.288-<br>150.959)    | 146.856<br>(143.387-<br>150.129)    | <b>&lt;0.001</b> | <b>5.49%</b>   |
| AVL<br>(mm)                            | 3.957 (1.790-<br>6.092)             | 6.059 (4.628-<br>8.532)             | 6.120 (4.816-<br>9.000)             | 6.559 (4.915-<br>8.759)             | 6.135 (4.760-<br>8.243)             | <b>&lt;0.001</b> | <b>53.13%</b>  |
| TNEP                                   | 240 (194-<br>412)                   | 169 (147-<br>210)                   | 170 (147-<br>206)                   | 168 (140-<br>197)                   | 170 (146-<br>199)                   | <b>&lt;0.001</b> | <b>-29.58%</b> |
| ML                                     | 0.0504<br>(0.0407-<br>0.072)        | 0.0398<br>(0.0322-<br>0.0474)       | 0.0378<br>(0.0307-<br>0.0457)       | 0.0377<br>(0.0311-<br>0.0456)       | 0.0385<br>(0.0315-<br>0.0469)       | <b>&lt;0.001</b> | <b>-20.97%</b> |

SVP = superficial vascular plexus; EA = explant area; VA = vessels area; VPA = vessels percentage area; TNJ = total number of junctions; JD = junctions density; TVL = total vessels length; AVL = average vessels length; TNEP = total number of end points; ML = mean lacunarity. This table shows median and interquartile ranges for each parameter (25th and 75th percentile). *P* values and percentages of change are presented one week after phacoemulsification.

Friedman ANOVA test, significant difference (bold values) was found for values with *p* < 0.001.

**Table S3.** Statistical analysis of changes in vascular parameters in superficial vascular complex.

| SVC                                    | Before                           | 1 week after                     | 1 month after                    | 3 months after                   | 6 months after                   | <i>p</i>         | Change         |
|----------------------------------------|----------------------------------|----------------------------------|----------------------------------|----------------------------------|----------------------------------|------------------|----------------|
| EA<br>(mm <sup>2</sup> )               | 8.3799<br>(8.3787-<br>8.3806)    | 8.3799<br>(8.3787-<br>8.3806)    | 8.3801<br>(8.3794-<br>8.3807)    | 8.3799<br>(8.3787-<br>8.3807)    | 8.3799 (8.3787-<br>8.3807)       | 0.889            | 0.01%          |
| VA<br>(mm <sup>2</sup> )               | 3.864 (3.127-<br>4.329)          | 4.637 (4.297<br>to 4.918)        | 4.703 (4.311-<br>5.021)          | 4.831 (4.453-<br>5.007)          | 4.748 (4.451-<br>4.989)          | <b>&lt;0.001</b> | <b>20.00%</b>  |
| VPA<br>(%)                             | 46.103<br>(37.310-<br>51.652)    | 55.323<br>(51.302-<br>58.753)    | 56.133<br>(51.491-<br>59.923)    | 57.639<br>(53.137-<br>59.854)    | 56.710 (53.113-<br>59.929)       | <b>&lt;0.001</b> | <b>20.00%</b>  |
| TNJ                                    | 1143 (895-<br>1306)              | 1384 (1286-<br>1475)             | 1394 (1285-<br>1487)             | 1424 (1327-<br>1479)             | 1406 (1320-<br>1476)             | <b>&lt;0.001</b> | <b>21.08%</b>  |
| JD<br>(junctions/<br>mm <sup>2</sup> ) | 137.096<br>(106.731-<br>155.833) | 165.132<br>(153.665-<br>176)     | 166.338<br>(153.287-<br>177.447) | 170.020<br>(158.352-<br>176.456) | 167.989<br>(157.466-<br>177.210) | <b>&lt;0.001</b> | <b>20.45%</b>  |
| TVL<br>(mm)                            | 128.843<br>(110.867-<br>138.255) | 143.106<br>(137.009-<br>147.567) | 143.976<br>(137.635-<br>148.805) | 145.559<br>(140.618-<br>149.084) | 144.972<br>(140.884-<br>148.726) | <b>&lt;0.001</b> | <b>11.07%</b>  |
| AVL<br>(mm)                            | 2.028 (0.760-<br>3.547)          | 5.389 (3.687-<br>7.106)          | 5.292 (3.600-<br>7.417)          | 5.996 (4.079-<br>8.904)          | 5.454 (4.148-<br>8.194)          | <b>&lt;0.001</b> | <b>165.76%</b> |
| TNEP                                   | 406 (285-<br>614)                | 224 (184-<br>278)                | 208 (180-<br>276)                | 201 (166-<br>271)                | 204 (176-250)                    | <b>&lt;0.001</b> | <b>-44.83%</b> |
| ML                                     | 0.0727<br>(0.0523-<br>0.115)     | 0.0487<br>(0.0403-<br>0.0588)    | 0.0481<br>(0.0385-<br>0.0562)    | 0.0458<br>(0.0377-<br>0.0564)    | 0.0475 (0.0392-<br>0.0585)       | <b>&lt;0.001</b> | <b>-33.06%</b> |

SVC = superficial vascular complex; EA = explant area; VA = vessels area; VPA = vessels percentage area; TNJ = total number of junctions; JD = junctions density; TVL = total vessels length; AVL = average vessels length; TNEP = total number of end points; ML = mean lacunarity.

This table shows median and interquartile ranges for each parameter (25th and 75th percentile). *P* values and percentages of change are presented one week after phacoemulsification.

Friedman ANOVA test, significant difference (bold values) was found for values with *p* < 0.001.

**Table S4.** Statistical analysis of changes in vascular parameters in intermediate capillary plexus.

| ICP                                    | Before                              | 1 week after                        | 1 month after                       | 3 months after                      | 6 months after                      | <i>p</i>         | Change         |
|----------------------------------------|-------------------------------------|-------------------------------------|-------------------------------------|-------------------------------------|-------------------------------------|------------------|----------------|
| EA<br>(mm <sup>2</sup> )               | 8.3800<br>(8.3774-<br>8.3806)       | 8.3797<br>(8.3779-<br>8.3808)       | 8.3801<br>(8.3788-<br>8.3809)       | 8.3800<br>(8.3786-<br>8.3808)       | 8.3800<br>(8.3786-<br>8.3808)       | 0.755            | 0.00%          |
| VA<br>(mm <sup>2</sup> )               | 4.4589<br>(3.6848-<br>4.7876)       | 5.0306<br>(4.7727-<br>5.2698)       | 5.0145<br>(4.7338-<br>5.2741)       | 5.1236<br>(4.7383-<br>5.3024)       | 5.0714<br>(4.8539-<br>5.2669)       | <b>&lt;0.001</b> | <b>12.82%</b>  |
| VPA<br>(%)                             | 53.2082<br>(53.2082-<br>57.1352)    | 60.0233<br>(56.9550-<br>62.8829)    | 59.8439<br>(56.4824-<br>62.9344)    | 61.1325<br>(56.5415-<br>63.2928)    | 60.5677<br>(57.9167-<br>62.8452)    | <b>&lt;0.001</b> | <b>12.81%</b>  |
| TNJ                                    | 1436 (1121-<br>1559)                | 1604 (1546-<br>1693)                | 1617 (1536-<br>1713)                | 1632 (1555-<br>1692)                | 1647 (1573-<br>1693)                | <b>&lt;0.001</b> | <b>11.70%</b>  |
| JD<br>(junctions/<br>mm <sup>2</sup> ) | 171.3555<br>(133.7933-<br>185.9862) | 191.3835<br>(184.4353-<br>201.9707) | 192.9544<br>(183.2330-<br>204.3767) | 194.7350<br>(185.5743-<br>201.8687) | 196.5190<br>(187.7151-<br>202.3389) | <b>&lt;0.001</b> | <b>11.69%</b>  |
| TVL<br>(mm)                            | 146.6273<br>(126.3234-<br>152.6902) | 154.7071<br>(152.0413-<br>159.6729) | 156.4076<br>(151.4608-<br>160.6250) | 156.7169<br>(152.8764-<br>159.7203) | 156.6050<br>(154.2605-<br>159.6352) | <b>&lt;0.001</b> | <b>5.51%</b>   |
| AVL<br>(mm)                            | 3.1479<br>(1.1489-<br>4.3315)       | 6.0974<br>(4.1989-<br>8.2731)       | 5.4723<br>(3.7972-<br>7.0673)       | 5.6966<br>(4.0042-<br>7.7599)       | 5.8670<br>(4.1286-<br>7.0363)       | <b>&lt;0.001</b> | <b>93.70%</b>  |
| TNEP                                   | 340 (263-<br>540)                   | 212 (184-<br>250)                   | 225 (184-<br>250)                   | 208 (176-<br>258)                   | 211 (186-<br>248)                   | <b>&lt;0.001</b> | <b>-37.65%</b> |
| ML                                     | 0.03600<br>(0.02781-<br>0.06323)    | 0.02584<br>(0.02011-<br>0.03056)    | 0.02427<br>(0.01990-<br>0.02934)    | 0.02442<br>(0.02016-<br>0.02882)    | 0.02448<br>(0.01952-<br>0.02880)    | <b>&lt;0.001</b> | <b>-28.22%</b> |

ICP = intermediate capillary plexus; EA = explant area; VA = vessels area; VPA = vessels percentage area; TNJ = total number of junctions; JD = junctions density; TVL = total vessels length; AVL = average vessels length; TNEP = total number of end points; ML = mean lacunarity.

This table shows median and interquartile ranges for each parameter (25th and 75th percentile). *P* values and percentages of change are presented one week after phacoemulsification.

Friedman ANOVA test, significant difference (bold values) was found for values with *p* < 0.001.

**Table S5.** Statistical analysis of changes in vascular parameters in deep capillary plexus.

| DCP                                    | Before                              | 1 week after                        | 1 month after                       | 3 months after                      | 6 months after                      | <i>p</i>         | Change         |
|----------------------------------------|-------------------------------------|-------------------------------------|-------------------------------------|-------------------------------------|-------------------------------------|------------------|----------------|
| EA<br>(mm <sup>2</sup> )               | 8.3801<br>(8.3766-<br>8.3803)       | 8.3802<br>(8.3790-<br>8.3808)       | 8.3802<br>(8.3789-<br>8.3807)       | 8.3801<br>(8.3790-<br>8.3810)       | 8.3801 (8.3790-<br>8.3810)          | 0.785            | 0.01%          |
| VA<br>(mm <sup>2</sup> )               | 4.3672<br>(3.8253-<br>4.7674)       | 4.9242<br>(4.6452-<br>5.2837)       | 4.9290<br>(4.7928-<br>5.3246)       | 5.0187<br>(4.7728-<br>5.2834)       | 5.0594 (4.7865-<br>5.2373)          | <b>&lt;0.001</b> | <b>12.75%</b>  |
| VPA<br>(%)                             | 52.1056<br>(45.6493-<br>56.8821)    | 58.7513<br>(55.4292-<br>63.0430)    | 58.8133<br>(57.1941-<br>63.5351)    | 59.9478<br>(57.4191-<br>63.0429)    | 60.4815<br>(57.1285-<br>62.6035)    | <b>&lt;0.001</b> | <b>12.75%</b>  |
| TNJ                                    | 1385 (1220-<br>1554)                | 1548 (1479-<br>1656)                | 1602 (1508-<br>1655)                | 1595 (1531-<br>1649)                | 1596 (1511-<br>1666)                | <b>&lt;0.001</b> | <b>11.77%</b>  |
| JD<br>(junctions/<br>mm <sup>2</sup> ) | 165.2630<br>(145.6565-<br>185.4727) | 184.7808<br>(176.4101-<br>197.5626) | 191.4179<br>(179.9524-<br>197.4751) | 190.3027<br>(182.6724-<br>197.1309) | 190.4480<br>(180.2703-<br>199.2827) | <b>&lt;0.001</b> | <b>11.81%</b>  |
| TVL<br>(mm)                            | 139.7239<br>(128.3934-<br>149.5305) | 150.9558<br>(146.4668-<br>156.3002) | 153.2497<br>(148.1792-<br>156.9497) | 152.7475<br>(148.6371-<br>157.0685) | 152.9109<br>(147.9636-<br>156.4881) | <b>&lt;0.001</b> | <b>8.04%</b>   |
| AVL<br>(mm)                            | 2.4405<br>(1.3330-<br>4.3567)       | 4.6059<br>(3.3411-<br>6.7264)       | 5.6519<br>(3.9798-<br>7.1728)       | 5.5208<br>(3.9462-<br>6.9299)       | 5.4975 (3.9042-<br>6.9947)          | <b>&lt;0.001</b> | <b>88.72%</b>  |
| TNEP                                   | 360 (252-<br>511)                   | 238 (179-<br>284)                   | 216 (175-<br>271)                   | 214 (179-<br>257)                   | 212 (185-251)                       | <b>&lt;0.001</b> | <b>-33.89%</b> |
| ML                                     | 0.06161<br>(0.04602-<br>0.08830)    | 0.04423<br>(0.03464-<br>0.05317)    | 0.04033<br>(0.03203-<br>0.04841)    | 0.04050<br>(0.03270-<br>0.04964)    | 0.04157<br>(0.03396-<br>0.05088)    | <b>&lt;0.001</b> | <b>-28.21%</b> |

DCP = deep capillary plexus; EA = explant area; VA = vessels area; VPA = vessels percentage area; TNJ = total number of junctions; JD = junctions density; TVL = total vessels length; AVL = average vessels length; TNEP = total number of end points; ML = mean lacunarity.

This table shows median and interquartile ranges for each parameter (25th and 75th percentile). *P* values and percentages of change are presented one week after phacoemulsification.

Friedman ANOVA test, significant difference (bold values) was found for values with *p* < 0.001.

**Table S6.** Statistical analysis of changes in vascular parameters in deep vascular complex.

| DVC                                    | Before                              | 1 week after                        | 1 month after                       | 3 months after                      | 6 months after                      | <i>p</i>         | Change         |
|----------------------------------------|-------------------------------------|-------------------------------------|-------------------------------------|-------------------------------------|-------------------------------------|------------------|----------------|
| EA<br>(mm <sup>2</sup> )               | 8.3799<br>(8.3791-<br>8.3807)       | 8.3799<br>(8.3788-<br>8.3808)       | 8.3800<br>(8.3791-<br>8.3810)       | 8.3799<br>(8.3788-<br>8.3808)       | 8.3799 (8.3788-<br>8.3808)          | 0.128            | 0.01%          |
| VA<br>(mm <sup>2</sup> )               | 4.7510<br>(4.0670-<br>5.1796)       | 5.3422<br>(5.1466-<br>5.6861)       | 5.4149<br>(5.2065-<br>5.6675)       | 5.5216<br>(5.2554-<br>5.6775)       | 5.5135 (5.2763-<br>5.6330)          | <b>&lt;0.001</b> | <b>12.44%</b>  |
| VPA<br>(%)                             | 56.6918<br>(48.5284-<br>61.8060)    | 63.7460<br>(61.4178-<br>67.8484)    | 64.6211<br>(62.1213-<br>67.6476)    | 65.8857<br>(62.7092-<br>67.7643)    | 65.7903<br>(62.9728-<br>67.2612)    | <b>&lt;0.001</b> | <b>12.44%</b>  |
| TNJ                                    | 1608 (1331-<br>1707)                | 1727 (1674-<br>1773)                | 1752 (1687-<br>1786)                | 1738 (1697-<br>1786)                | 1738 (1688-<br>1779)                | <b>&lt;0.001</b> | <b>7.40%</b>   |
| JD<br>(junctions/<br>mm <sup>2</sup> ) | 191.8826<br>(159.0030-<br>203.6972) | 206.0519<br>(199.7749-<br>211.4806) | 209.1735<br>(201.2836-<br>213.1473) | 207.4106<br>(202.9628-<br>213.0718) | 207.4106<br>(201.5647-<br>212.2858) | <b>&lt;0.001</b> | <b>7.38%</b>   |
| TVL<br>(mm)                            | 153.2259<br>(134.9415-<br>159.5338) | 160.7572<br>(157.9655-<br>163.2968) | 161.7421<br>(158.5118-<br>163.9697) | 161.7186<br>(158.4459-<br>163.5630) | 160.7295<br>(158.9470-<br>163.2466) | <b>&lt;0.001</b> | <b>4.92%</b>   |
| AVL<br>(mm)                            | 4.8106<br>(1.3235-<br>10.6267)      | 13.7022<br>(8.7047-<br>21.8198)     | 13.5446<br>(9.3401-<br>20.2722)     | 16.3397<br>(9.1956-<br>22.6235)     | 14.4311<br>(9.8113-<br>18.5240)     | <b>&lt;0.001</b> | <b>184.83%</b> |
| TNEP                                   | 272 (177-<br>479)                   | 142 (105-<br>176)                   | 133 (109-<br>162)                   | 119 (101-<br>160)                   | 124 (103-157)                       | <b>&lt;0.001</b> | <b>-47.79%</b> |
| ML                                     | 0.03666<br>(0.02911-<br>0.06960)    | 0.02667<br>(0.02151-<br>0.03206)    | 0.02542<br>(0.02017-<br>0.03085)    | 0.02482<br>(0.02054-<br>0.02973)    | 0.02674<br>(0.02075-<br>0.03134)    | <b>&lt;0.001</b> | <b>-27.24%</b> |

DVC = deep vascular complex; EA = explant area; VA = vessels area; VPA = vessels percentage area; TNJ = total number of junctions; JD = junctions density; TVL = total vessels length; AVL = average vessels length; TNEP = total number of end points; ML = mean lacunarity.

This table shows median and interquartile ranges for each parameter (25th and 75th percentile). *P* values and percentages of change are presented one week after phacoemulsification.

Friedman ANOVA test, significant difference (bold values) was found for values with *p* < 0.001.

**Table S7.** Statistical analysis of changes in vascular parameters in retina.

| RETINA                                 | Before                              | 1 week after                        | 1 month after                       | 3 months after                      | 6 months after                      | <i>p</i>         | Change         |
|----------------------------------------|-------------------------------------|-------------------------------------|-------------------------------------|-------------------------------------|-------------------------------------|------------------|----------------|
| EA<br>(mm <sup>2</sup> )               | 8.3796<br>(8.3782-<br>8.3805)       | 8.3796<br>(8.3781-<br>8.3807)       | 8.3798<br>(8.3789-<br>8.3805)       | 8.3800<br>(8.3794-<br>8.3808)       | 8.3800 (8.3794-<br>8.3808)          | 0.567            | 0.01%          |
| VA<br>(mm <sup>2</sup> )               | 4.4098<br>(3.9080-<br>4.8648)       | 4.9427<br>(4.7097-<br>5.1777)       | 5.0057<br>(4.7243-<br>5.2723)       | 5.1038<br>(4.8357-<br>5.3189)       | 5.0444 (4.8364-<br>5.3010)          | <b>&lt;0.001</b> | <b>12.09%</b>  |
| VPA<br>(%)                             | 52.6185<br>(46.6445-<br>58.0554)    | 58.9799<br>(56.1958-<br>61.7856)    | 59.7317<br>(56.3762-<br>62.9090)    | 60.9041<br>(57.7023-<br>63.4796)    | 60.1941<br>(57.7098-<br>63.2794)    | <b>&lt;0.001</b> | <b>12.09%</b>  |
| TNJ                                    | 1529 (1348-<br>1683)                | 1709 (1637-<br>1771)                | 1730 (1654-<br>1788)                | 1746 (1670-<br>1787)                | 1734 (1670-<br>1787)                | <b>&lt;0.001</b> | <b>11.77%</b>  |
| JD<br>(junctions/<br>mm <sup>2</sup> ) | 182.4319<br>(160.8864-<br>200.7545) | 204.0459<br>(195.3320-<br>211.3452) | 206.4779<br>(197.4950-<br>213.3626) | 208.4055<br>(199.2211-<br>213.2483) | 207.3842<br>(199.2396-<br>213.5274) | <b>&lt;0.001</b> | <b>11.85%</b>  |
| TVL<br>(mm)                            | 150.7949<br>(139.6191-<br>158.1094) | 159.9335<br>(155.9889-<br>162.6339) | 160.7585<br>(156.4810-<br>164.0373) | 161.6095<br>(156.9008-<br>163.6342) | 160.9889<br>(156.9437-<br>162.8714) | <b>&lt;0.001</b> | <b>6.06%</b>   |
| AVL<br>(mm)                            | 2.5953<br>(1.2544-<br>4.8658)       | 7.4237<br>(4.1864-<br>10.6714)      | 7.7464<br>(4.5762-<br>11.6792)      | 7.1950<br>(4.9531-<br>10.3802)      | 7.6356 (5.0180-<br>11.6167)         | <b>&lt;0.001</b> | <b>186.04%</b> |
| TNEP                                   | 359 (265-<br>560)                   | 210 (184-<br>303)                   | 207 (159-<br>270)                   | 192 (154-<br>247)                   | 192 (161-256)                       | <b>&lt;0.001</b> | <b>-41.50%</b> |
| ML                                     | 0.03956<br>(0.03072-<br>0.06329)    | 0.02937<br>(0.02439-<br>0.03750)    | 0.02904<br>(0.02317-<br>0.03310)    | 0.02678<br>(0.02315-<br>0.03221)    | 0.02853<br>(0.02292-<br>0.03490)    | <b>&lt;0.001</b> | <b>-25.76%</b> |

EA = explant area; VA = vessels area; VPA = vessels percentage area; TNJ = total number of junctions; JD = junctions density; TVL = total vessels length; AVL = average vessels length; TNEP = total number of end points; ML = mean lacunarity. This table shows median and interquartile ranges for each parameter (25th and 75th percentile). *P* values and percentages of change are presented one week after phacoemulsification.

Friedman ANOVA test, significant difference (bold values) was found for values with *p* < 0.001.



**Table S8.** Statistical analysis of changes in vascular parameters in choriocapillaris.

| CC                                     | Before                              | 1 week after                        | 1 months after                      | 3 months after                      | 6 months after                      | <i>p</i>         | Change         |
|----------------------------------------|-------------------------------------|-------------------------------------|-------------------------------------|-------------------------------------|-------------------------------------|------------------|----------------|
| EA<br>(mm <sup>2</sup> )               | 8.3802<br>(8.3792-<br>8.3808)       | 8.3800<br>(8.3791-<br>8.3807)       | 8.3802<br>(8.3792-<br>8.3808)       | 8.3806<br>(8.3794-<br>8.3810)       | 8.3806 (8.3794-<br>8.3810)          | 0.742            | 0.00%          |
| VA<br>(mm <sup>2</sup> )               | 6.4122<br>(6.1682-<br>6.5987)       | 6.4489<br>(6.2490-<br>6.6267)       | 6.4555<br>(6.3336-<br>6.6340)       | 6.4811<br>(6.3198-<br>6.6653)       | 6.5013 (6.3096-<br>6.6464)          | 0.279            | 0.57%          |
| VPA<br>(%)                             | 76.5091<br>(73.6006-<br>78.7315)    | 76.9443<br>(74.6011-<br>79.0804)    | 77.0477<br>(75.5775-<br>79.1660)    | 77.4137<br>(75.4058-<br>79.5406)    | 77.6670<br>(75.2858-<br>79.3051)    | 0.243            | 0.57%          |
| TNJ                                    | 1721 (1597-<br>1666)                | 1713 (1673-<br>1760)                | 1707 (1673-<br>1756)                | 1707 (1665-<br>1744)                | 1705 (1658-<br>1757)                | 0.834            | -0.46%         |
| JD<br>(junctions/m<br>m <sup>2</sup> ) | 205.3361<br>(198.7315-<br>210.2192) | 204.3816<br>(199.6236-<br>209.9921) | 203.7769<br>(199.6878-<br>209.5172) | 203.6657<br>(198.6613-<br>208.0507) | 203.4641<br>(197.8568-<br>209.6402) | 0.789            | -0.46%         |
| TVL<br>(mm)                            | 163.5641<br>(161.1857-<br>164.8765) | 163.4505<br>(161.5202-<br>164.9303) | 163.2078<br>(161.3249-<br>164.8354) | 163.1552<br>(161.4501-<br>164.5270) | 163.1552<br>(161.0359-<br>165.2222) | 0.914            | -0.07%         |
| AVL<br>(mm)                            | 39.7701<br>(24.5450-<br>82.0256)    | 53.9182<br>(32.4966-<br>81.4227)    | 54.6377<br>(39.5678-<br>138.3566)   | 54.4731<br>(33.0892-<br>157.7326)   | 55.1272<br>(40.6070-<br>81.4441)    | 0.008            | 35.57%         |
| <b>TNEP</b>                            | 86 (65-116)                         | 77 (57-98)                          | 74 (58-91)                          | 72 (54-96)                          | 73 (57-87)                          | <b>&lt;0.001</b> | <b>-10.47%</b> |
| ML                                     | 0.007167<br>(0.006056-<br>0.009225) | 0.006810<br>(0.005702-<br>0.008304) | 0.006560<br>(0.005650-<br>0.007455) | 0.006474<br>(0.005571-<br>0.007438) | 0.006331<br>(0.005625-<br>0.007387) | 0.001            | -4.99%         |

CC = choriocapillaris; EA = explant area; VA = vessels area; VPA = vessels percentage area; TNJ = total number of junctions; JD = junctions density; TVL = total vessels length; AVL = average vessels length; TNEP = total number of end points; ML = mean lacunarity. This table shows median and interquartile ranges for each parameter (25th and 75th percentile). *P* values and percentages of change are presented for values one week after phacoemulsification.

Friedman ANOVA test, significant difference (bold values) was found for values with *p* < 0.001.

**Table S9.** Statistical analysis of changes in vascular parameters in choroid.

| CHOROID                                | Before                              | 1 week after                        | 1 month after                       | 3 months after                      | 6 months after                      | <i>p</i>         | Change        |
|----------------------------------------|-------------------------------------|-------------------------------------|-------------------------------------|-------------------------------------|-------------------------------------|------------------|---------------|
| EA<br>(mm <sup>2</sup> )               | 8.3802<br>(8.3791-<br>8.3812)       | 8.3803<br>(8.3791-<br>8.3812)       | 8.3800<br>(8.3791-<br>8.3807)       | 8.3800<br>(8.3791-<br>8.3809)       | 8.3801 (8.3791-<br>8.3809)          | 0.359            | 0.00%         |
| VA<br>(mm <sup>2</sup> )               | 5.6874<br>(5.4705-<br>5.8991)       | 5.5657<br>(5.3586-<br>5.7712)       | 5.5691<br>(5.3594-<br>5.7349)       | 5.5739<br>(5.3481-<br>5.7323)       | 5.5278 (5.3234-<br>5.7335)          | <b>&lt;0.001</b> | <b>-2.14%</b> |
| VPA<br>(%)                             | 67.8640<br>(65.2963-<br>70.3878)    | 66.4090<br>(63.9407-<br>68.8593)    | 66.4687<br>(64.0577-<br>68.4274)    | 66.5272<br>(63.9207-<br>68.4411)    | 66.1934<br>(63.5885-<br>68.4478)    | <b>&lt;0.001</b> | <b>-2.14%</b> |
| TNJ                                    | 1499 (1453-<br>1564)                | 1530 (1469-<br>1596)                | 1549 (1483-<br>1589)                | 1537 (1492-<br>1603)                | 1539 (1499-<br>1590)                | 0.001            | 1.32%         |
| JD<br>(junctions/<br>mm <sup>2</sup> ) | 180.5265<br>(173.5863-<br>186.6140) | 182.9515<br>(175.4667-<br>190.4935) | 184.8182<br>(176.9989-<br>189.6404) | 183.4202<br>(178.0604-<br>191.2431) | 183.7723<br>(178.8927-<br>189.8698) | <b>&lt;0.001</b> | <b>1.34%</b>  |
| TVL<br>(mm)                            | 152.9726<br>(149.5086-<br>155.7017) | 153.0903<br>(149.4116-<br>155.8366) | 153.6118<br>(150.1565-<br>156.1263) | 153.0702<br>(150.7052-<br>155.9868) | 153.2636<br>(150.6808-<br>155.9098) | 0.319            | 0.08%         |
| AVL<br>(mm)                            | 10.0777<br>(6.5411-<br>15.3401)     | 10.1020<br>(6.4623-<br>14.2535)     | 9.7952<br>(7.1834-<br>15.4482)      | 11.5864<br>(7.0002-<br>15.7957)     | 11.6441<br>(6.8459-<br>15.8033)     | 0.839            | 0.24%         |
| TNEP                                   | 199 (162-<br>249)                   | 215 (172-<br>250)                   | 208 (176-<br>244)                   | 210 (168-<br>255)                   | 206 (174-258)                       | <b>&lt;0.001</b> | <b>8.04%</b>  |
| ML                                     | 0.01311<br>(0.01130-<br>0.01628)    | 0.01382<br>(0.01174-<br>0.01658)    | 0.01383<br>(0.01176-<br>0.01569)    | 0.01348<br>(0.01165-<br>0.01671)    | 0.01373<br>(0.01164-<br>0.01597)    | 0.113            | 5.44%         |

EA = explant area; VA = vessels area; VPA = vessels percentage area; TNJ = total number of junctions; JD = junctions density; TVL = total vessels length; AVL = average vessels length; TNEP = total number of end points; ML = mean lacunarity.

The table shows median and interquartile ranges for each parameter (25th and 75th percentile). *P* values and percentages of change are presented one week after phacoemulsification.

Friedman ANOVA test, significant difference (bold values) was found for values with *p* < 0.001.
